# Supplementary material for: Temporal Regulation of Distinct Internal Ribosome Entry Sites of the Dicistroviridae Cricket Paralysis Virus
Source: PubMed Central journal article supplement (PMC4728584; doi:10.3390/v8010025), 2016-01-19
Supplement: viruses-08-00025-s001.pdf [file viruses-08-00025-s001.pdf]

# Supplementary Materials: Temporal Regulation of Distinct Internal Ribosome Entry Sites of the *Dicistroviridae* Cricket Paralysis Virus

Anthony Khong, Jennifer M. Bonderoff, Ruth V. Spriggs, Erik Tammperre, Craig H. Kerr, Thomas J. Jackson, Anne E. Willis and Eric Jan

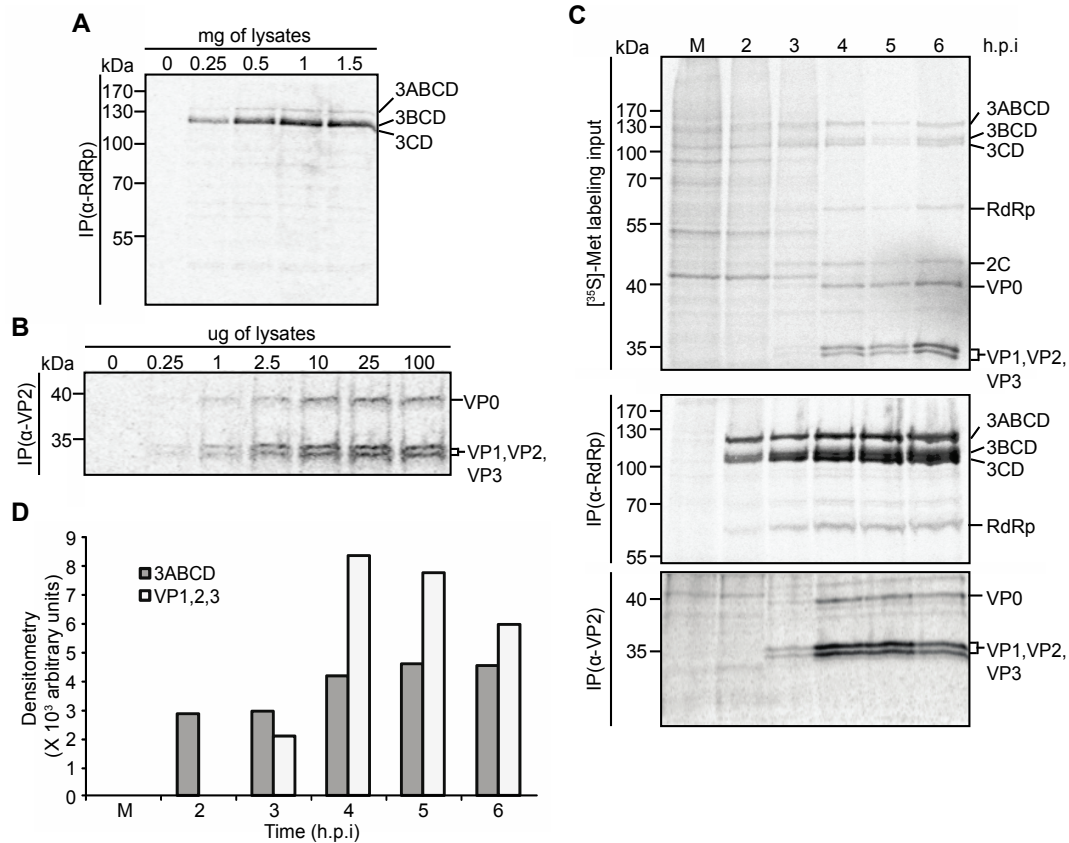

**Figure S1.** CrPV protein synthesis by immunoprecipitation analysis. Increasing amounts of pulse labelled protein lysates from CrPV-infected S2 cells (MOI 10, six h.p.i) were immunoprecipitated with a fixed amount of (A)  $\alpha$ -RdRp or (B)  $\alpha$ -VP2 antibodies. Pulldowns were resolved on a 12% SDS-PAGE; (C) 0.25 mg and 2.5  $\mu$ g of protein lysates isolated from mock- or CrPV-infected (MOI 10) cells for the indicated times (hpi) were immunoprecipitated with  $\alpha$ -RdRp or  $\alpha$ -VP2 antibodies respectively; (D) Raw densitometric quantitation of immunoprecipitated pulse-labelled RdRp\* protein and structural proteins VP1, VP2, and VP3 from (C). Cells were metabolically labelled with [<sup>35</sup>S]-Met/Cys for one hour prior to the end of each time point. Shown are representative autoradiographs from 2 experiments. RdRp\*, RdRp\*\*, and RdRp\*\*\* denote polyproteins containing RdRp at the approximate sizes of 120 kDa, 105 kDa, and 100 kDa respectively.

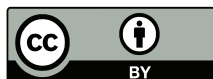

© 2016 by the authors; licensee MDPI, Basel, Switzerland. This article is an open access article distributed under the terms and conditions of the Creative Commons by Attribution (CC-BY) license (<http://creativecommons.org/licenses/by/4.0/>).
